# Supplementary material for: Why Is There a Link Between Smoking and Suicide? In Reply
Source: Atypon-hosted journal article supplement (doi:10.1176/appi.ps.660304), 2015-03-01
Supplement: appi.ps.660304.ds001.pdf [file appi.ps.660304.ds001.pdf]

**Table 1: Crude and Adjusted Odds Ratios of Suicide and Smoking Behaviour (Restricted to Suicidal Deaths as Cases, Accidental Deaths as Controls)**

|                                           | MALES |           |              |           |           |              | FEMALES |          |              |           |          |                  |
|-------------------------------------------|-------|-----------|--------------|-----------|-----------|--------------|---------|----------|--------------|-----------|----------|------------------|
|                                           | Crude |           | P<br>(trend) | Adjusted* |           | P<br>(trend) | Crude   |          | P<br>(trend) | Adjusted* |          | P<br>(trend<br>) |
| <i>Model 1:</i> Lifetime Smoking Duration | OR    | 95% CI    |              | OR        | 95% CI    |              | OR      | 95% CI   |              | OR        | 95% CI   |                  |
| 0 to 10 years                             | 1     |           | <.001        | 1         |           | <.01         | 1       |          | .88          | 1         |          | .41              |
| 11 to 20 years                            | 1.26  | .96–1.65  |              | 1.16      | .78-1.71  |              | .68     | .33-1.44 |              | .68       | .30-1.53 |                  |
| 21 to 40 years                            | 1.32  | 1.04-1.68 |              | 1.35      | .87-2.09  |              | .87     | .56-1.35 |              | 1.16      | .53-2.54 |                  |
| 41 years and above                        | 1.80  | 1.37-2.38 |              | 2.37      | 1.35-4.16 |              | .58     | .34-.98  |              | 1.70      | .63-4.62 |                  |
| <i>Model 2:</i> Ever quit smoking         |       |           |              |           |           |              |         |          |              |           |          |                  |
| <i>No</i>                                 | 1     |           | N/A          | 1         |           | N/A          | 1       |          | N/A          | 1         |          | N/A              |
| <i>Yes</i>                                | .51   | .40-.65   |              | .36       | .24-.53   |              | .60     | .38-.95  |              | 1.06      | .59-1.94 |                  |
| <i>Model 3:</i> Abstinence Duration       |       |           |              |           |           |              |         |          |              |           |          |                  |
| <i>Current smoker</i>                     | 1     |           | <.001        | 1         |           | <.001        | 1       |          | .05          | 1         |          | .76              |
| <i>1 to &lt; 5 years</i>                  | .80   | .42-1.56  |              | .44       | .14-1.38  |              | .43     | .12-1.49 |              | .76       | .18-3.24 |                  |
| <i>5 to &lt; 11 years</i>                 | .55   | .34-.90   |              | .46       | .22-.95   |              | .62     | .27-1.40 |              | 1.21      | .43-3.44 |                  |
| <i>11 or more</i>                         | .46   | .35-.61   |              | .32       | .20-.51   |              | .63     | .37-1.07 |              | 1.10      | .52-2.31 |                  |

\*In adjusted models, the following covariates were entered: living alone in the last year of life, race, veteran status, age, substance use, depressive symptoms, and drinking in the last year of life, keeping a firearm in the house.

**Table 2: Distribution of Cases (Suicide Decedents) and Controls (Accident and Homicide Decedents) by Lifetime Smoking Status, if Non-smokers were included in the analysis**

| Lifetime Smoking Status | Group            |               | Total      |
|-------------------------|------------------|---------------|------------|
|                         | Controls (n (%)) | Cases (n (%)) |            |
| Non-smoker              | 2884 (48)        | 514 (34)      | 3398 (45)  |
| Smoker                  | 3125 (52)        | 989 (66)      | 4114 (55)  |
| Total                   | 6009 (100)       | 1503 (100)    | 7512 (100) |

**Table 3: Unadjusted Odds Ratios of Suicide by Lifetime Smoking Status and Depressive Symptoms**

|                     | MALES               | FEMALES             |
|---------------------|---------------------|---------------------|
| Smoker              | 1.29 (1.06–1.59)    | 0.81 (.32 to 2.00)  |
| Depressive symptoms | 1.13 (1.12 to 1.14) | 1.12 (1.08 to 1.16) |
